# Supplementary material
Source: PubMed Central journal article supplement (PMC4195785)
Supplement: embj0033-1896-sd5.pdf [file embj0033-1896-sd5.pdf]

The Western Blots of EncA have 6 lanes: lanes 1 and 2 are *M. xanthus* tan cells; lanes 3 and 4 are yellow cells; and lanes 5 and 6 are spores, respectively after 48 hrs or 96 hrs of development (note that lane 6 detects no EncA). In lanes 1 and 3 cells were grown in rich CTT medium and in lanes 2 and 4 in starvation TPM medium. For each lane,  $10^8$  cells or spores were loaded. Since tan and yellow phase variants of *M. xanthus* express about the same amount of EncA under vegetative and starvation conditions, in the manuscript only the results for the yellow variant are described.
